# Supplementary material
Source: publisher site journal article supplement (https://study.sagepub.com/sites/default/files/phillips_kelly_2e_appendix_1c.doc)
Supplement: Supplementary file 1 [file phillips_kelly_2e_appendix_1c.doc]

**APPENDIX 1(c)** Example of Non-word Reading Test

**NON-WORD READING TEST**

| **nid** | **fod** | **jud** | **tek** | **mab** |
| --- | --- | --- | --- | --- |
| **kep** | **zid** | **hev** | **gan** | **rox** |
|  |  |  |  |  |
| **sta** | **spov** | **flet** | **trag** | **blen** |
| **plig** | **clum** | **snat** | **sked** | **grob** |
|  |  |  |  |  |
| **jund** | **vung** | **bilk** | **wist** | **famp** |
| **melf** | **yalp** | **masp** | **donk** | **sesk** |
|  |  |  |  |  |
| **chon** | **thid** | **whad** | **shev** | **mich** |
| **heth** | **kush** | **quon** | **hoth** | **frang** |
|  |  |  |  |  |
| **genned** | **junting** | **stibbed** | **fondwin** | **palkened** |
| **danlerwin** | **etc.** |  |  |  |

**Photocopiable**

*Assessment of Learners with Dyslexic-Type Difficulties* 2e © 2018 Sylvia Phillips and Kathleen Kelly (Sage: London)
